# Supplementary material for: Tool to assess risk of bias in studies estimating the prevalence of mental health disorders (RoB-PrevMH)
Source: PubMed Central journal article supplement (PMC10619100; doi:10.1136/bmjment-2023-300694), 2023-10-29
Supplement: bmjment-2023-300694supp001.pdf [file bmjment-2023-300694supp001.pdf]

Appendix X. Search strategy for identifying tools to assess the risk of bias in prevalence studies

- 1 exp Prevalence/
- 2 prevalence.ti,ab.
- 3 prevalence stud\*.ti,ab.
- 4 or/1-3
- 5 risk of bias.ti,ab.
- 6 exp Bias/
- 7 bias.ti,ab.
- 8 methodological quality.ti,ab
- 9 or/5-8
- 10 exp Checklist/
- 11 checklis\*.ti,ab.
- 12 assessment tool.ti,ab.
- 13 exp Guideline/
- 14 guidelin\*.ti,ab.
- 15 or/9-13
- 16 4 and 14 and 15
